# Supplementary material for: A sustainable method toward melamine-based conjugated polymer semiconductors for efficient photocatalytic hydrogen production under visible light
Source: Royal Society of Chemistry journal article supplement (doi:10.1039/c7gc02231j), 2017-12-04
Supplement: c7gc02231j1.pdf [file c7gc02231j1.pdf]

**Sustainable method toward melamine-based conjugated polymer semiconductors  
for efficient photocatalytic hydrogen production under visible light**

Xiubing Huang, Zhenyu Wu, Haiyan Zheng, Wenjun Dong, and Ge Wang\*

Beijing Key Laboratory of Function Materials for Molecule & Structure Construction,  
School of Materials Science and Engineering, University of Science and Technology  
Beijing, Beijing 100083, People's Republic of China

\*Corresponding author: Prof. Ge Wang ([gewang@mater.ustb.edu.cn](mailto:gewang@mater.ustb.edu.cn))

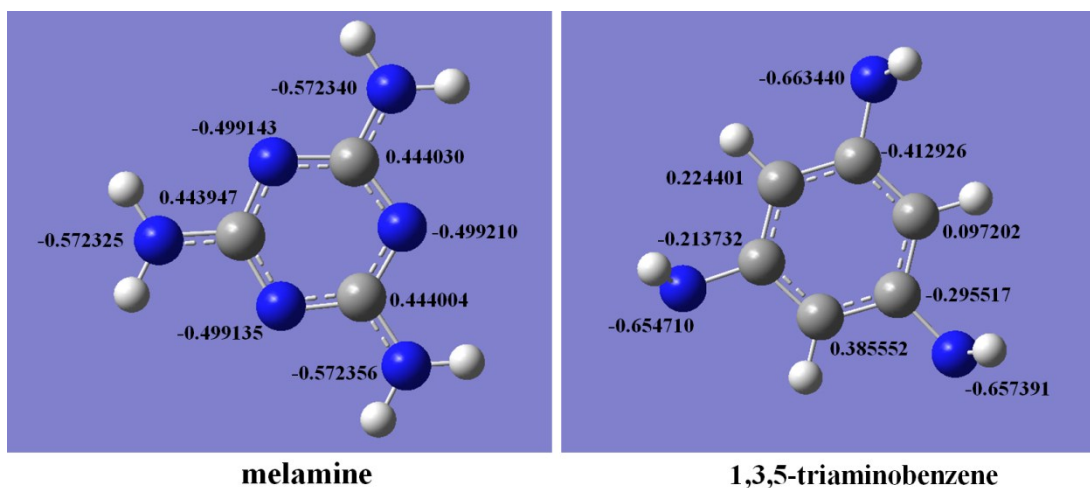

**Figure S1.** Electron density of melamine and 1,3,5-triaminobenzene calculated through Gauss.

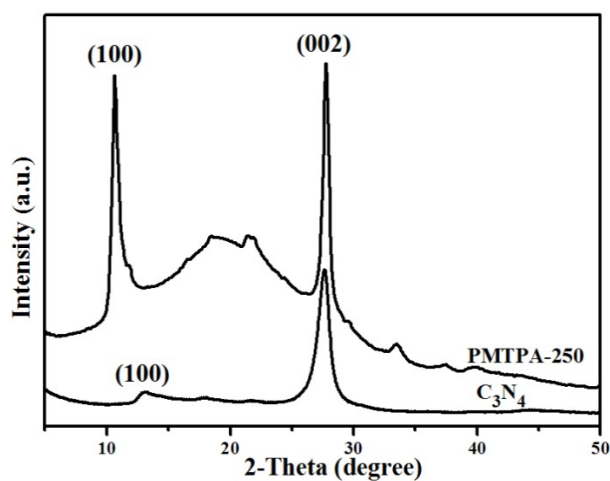

**Figure S2.** XRD patterns of  $C_3N_4$  and PMTPA-250.

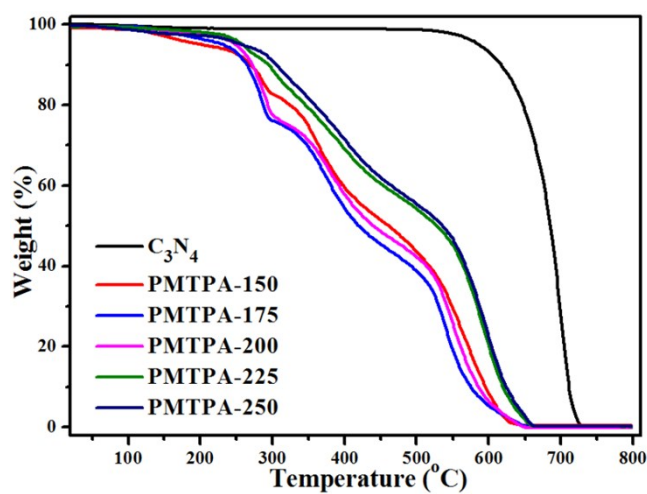

**Figure S3.** TGA curves of as-prepared samples with 10 °C/min increasing rate from room temperature to 800 °C.

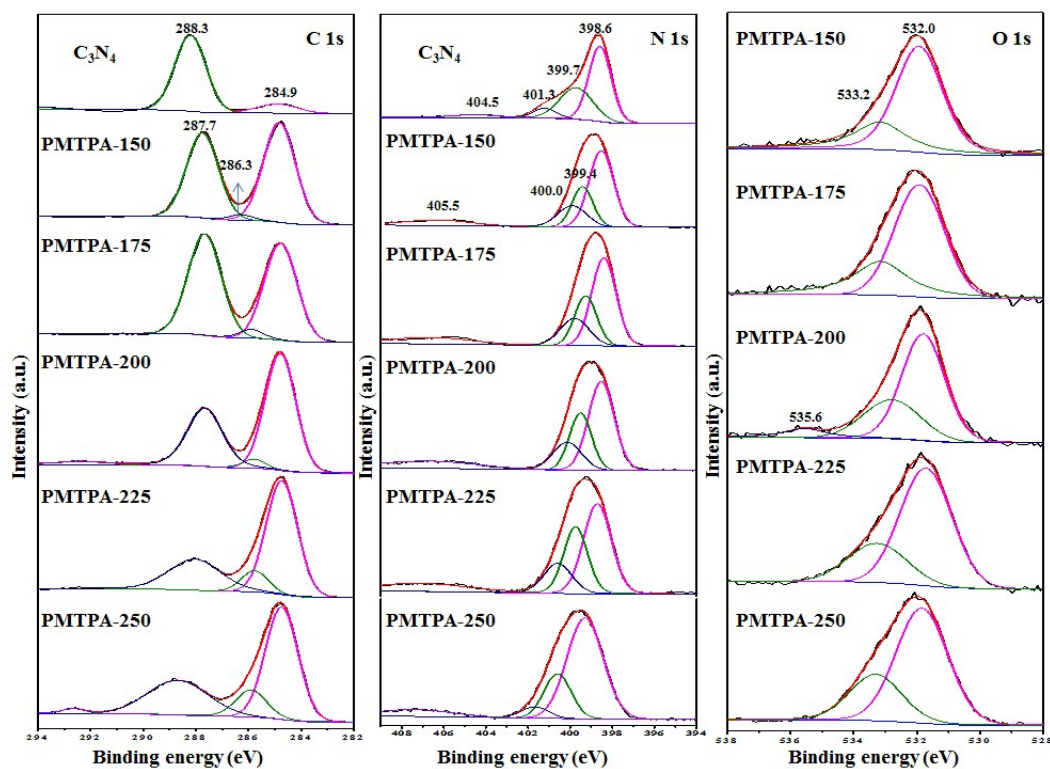

**Figure S4.** C 1s, N 1s and O 1s XPS spectra of the as-prepared samples.

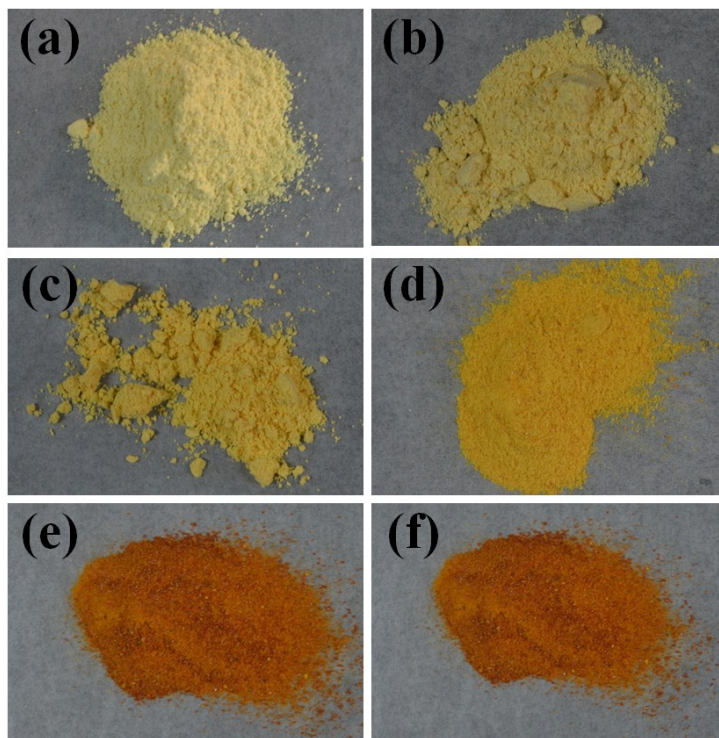

**Figure S5.** Sample pictures: (a) C<sub>3</sub>N<sub>4</sub>, (b) PMTPA-150, (c) PMTPA-175, (d) PMTPA-200, (e) PMTPA-225, (f) PMTPA-250.

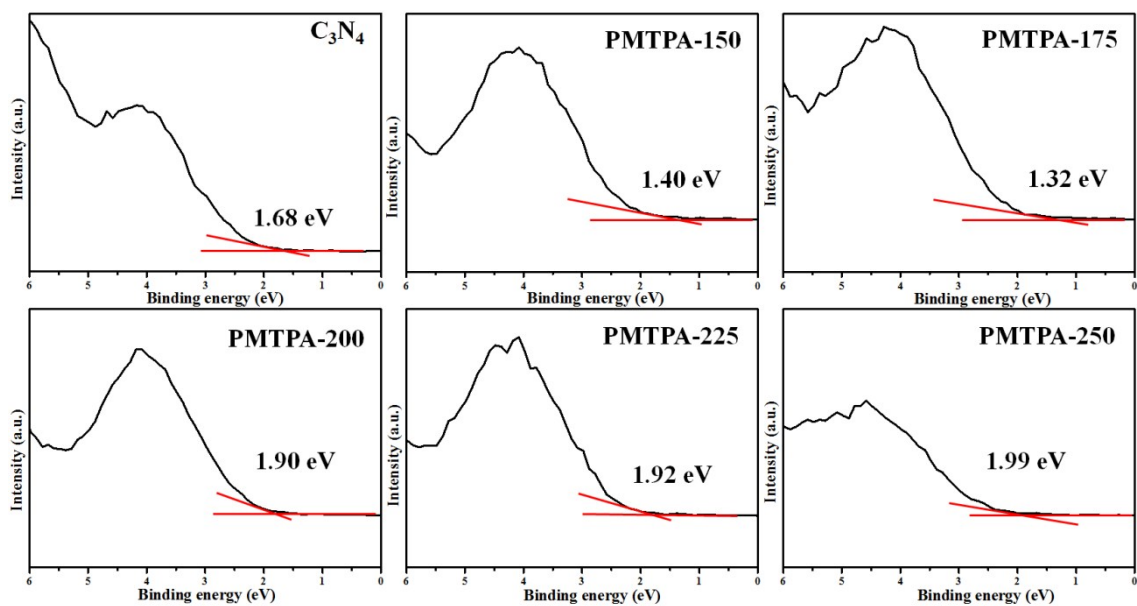

**Figure S6.** High-resolution valence band XPS spectra of as-prepared samples.

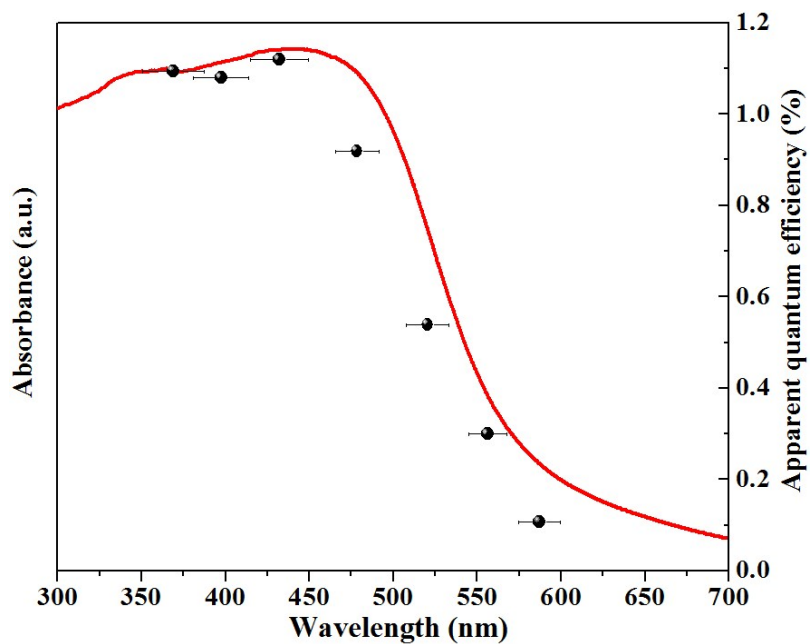

**Figure S7.** UV-Vis spectrum and AQE for PMTPA-250.

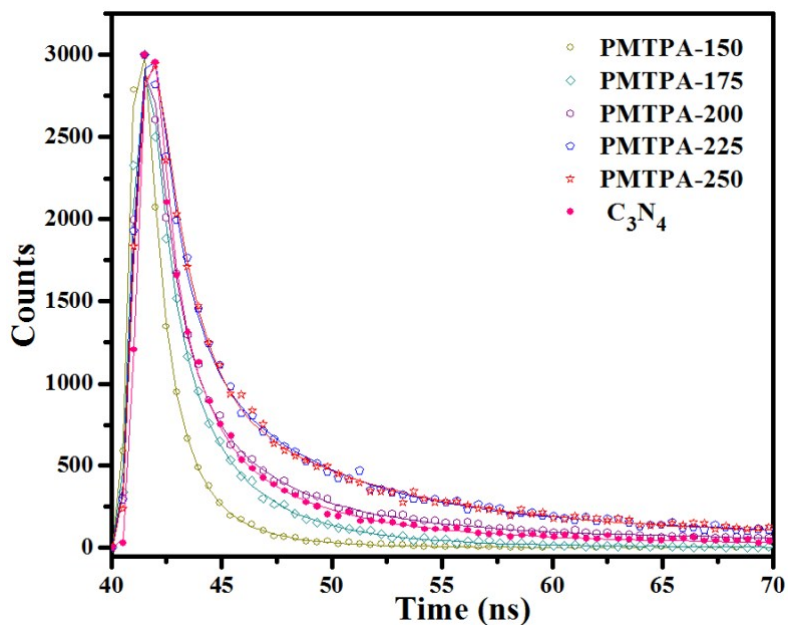

**Figure S8.** Time-resolved fluorescence decay spectra of PMTPA-150, PMTPA-175, PMTPA-200, PMTPA-225, PMTPA-250 and C<sub>3</sub>N<sub>4</sub> samples monitored at 463, 523, 540, 558, 558 and 460 nm, respectively, by time-correlated single-photo counting. The samples were excited by the incident light of 340 nm.

**Table S1.** Physicochemical properties, band gap and VB/CB positions of as-prepared samples. VB was determined by high-resolution valence band XPS spectra, band gap was calculated from UV-Vis spectrum.

| Sample                        | Surface area<br>[m <sup>2</sup> /g] | Band gap<br>[eV] | VB/CB<br>[eV] |
|-------------------------------|-------------------------------------|------------------|---------------|
| C <sub>3</sub> N <sub>4</sub> | 14.3                                | 2.78             | 1.68/-1.10    |
| PMTPA-150                     | 1.5                                 | 2.74             | 1.40/-1.34    |
| PMTPA-175                     | 2.0                                 | 2.62             | 1.32/-1.30    |
| PMTPA-200                     | 1.3                                 | 2.35             | 1.90/-0.45    |
| PMTPA-225                     | 1.3                                 | 2.21             | 1.92/-0.29    |
| PMTPA-250                     | 3.3                                 | 2.12             | 1.99/-0.13    |

**Table S2.** The fitting results of the fluorescence decay curves through a tri-exponential function.

| Sample                        | $\tau_1$ [ns]-Rel% | $\tau_2$ [ns]-Rel% | $\tau_3$ [ns]-Rel% | T <sub>average</sub> [ns] |
|-------------------------------|--------------------|--------------------|--------------------|---------------------------|
| C <sub>3</sub> N <sub>4</sub> | 1.545-89.50%       | 8.402-9.80%        | 51.968-0.70%       | 10.06                     |
| PMTPA-150                     | 0.2846-77.26%      | 1.2758-19.95%      | 3.6028-2.80%       | 1.307                     |
| PMTPA-175                     | 0.5738-71.54%      | 2.3307-22.03%      | 5.2783-6.42%       | 2.5523                    |
| PMTPA-200                     | 0.7377-78.10%      | 3.8828-19.25%      | 23.4117-2.64%      | 9.2074                    |
| PMTPA-225                     | 0.9171-74.56%      | 5.5543-21.80%      | 32.9125-3.60%      | 15.1014                   |
| PMTPA-250                     | 1.1792-78.13%      | 7.1488-19.08%      | 42.8416-2.78%      | 17.8619                   |
